# Supplementary material for: Impact of dormancy periods on some physiological and biochemical indices of potato tubers
Source: PeerJ journal article supplement (doi:10.7717/peerj.15923), 2023-08-28

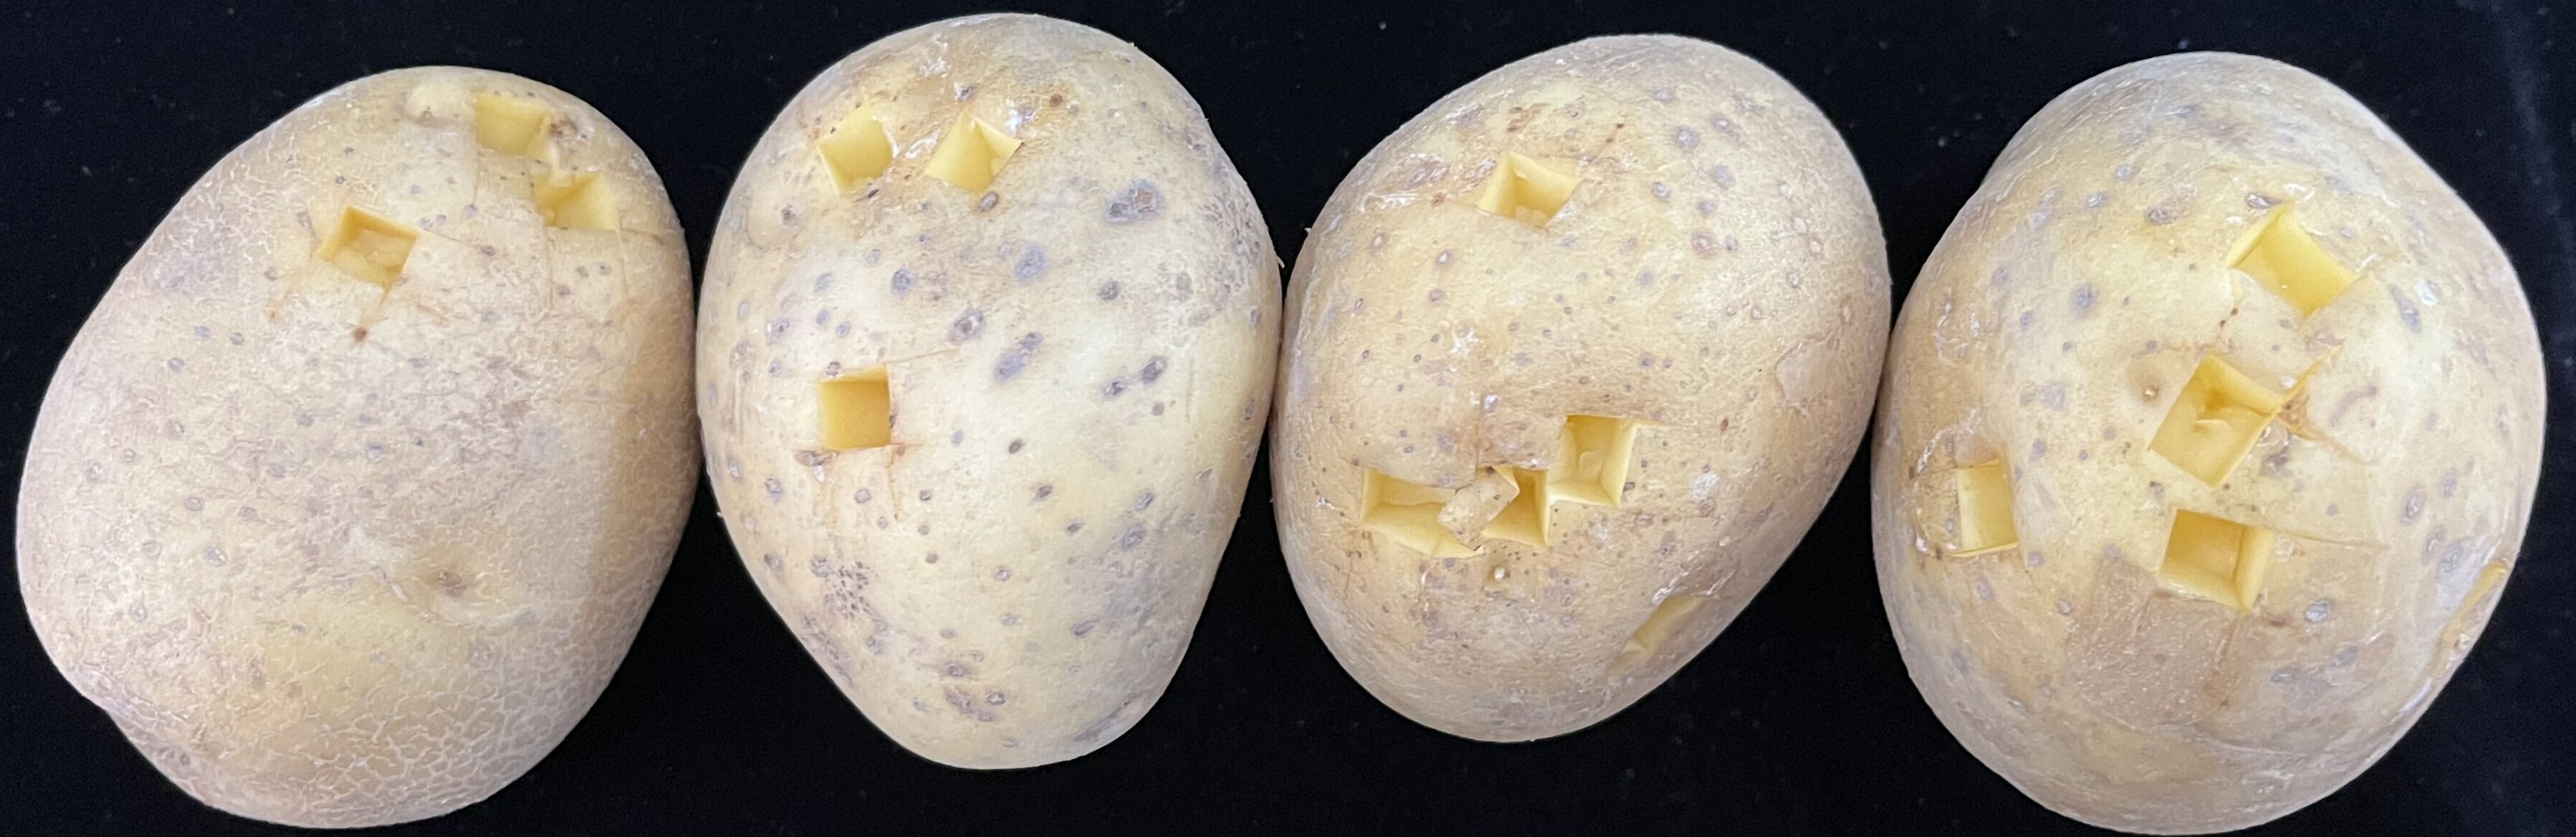

Supplement: Figure_S1.pdf [file Figure_S1.pdf]
