# Supplementary material for: Impact of dormancy periods on some physiological and biochemical indices of potato tubers
Source: PeerJ journal article supplement (doi:10.7717/peerj.15923), 2023-08-28

SDV: Yunsu 306

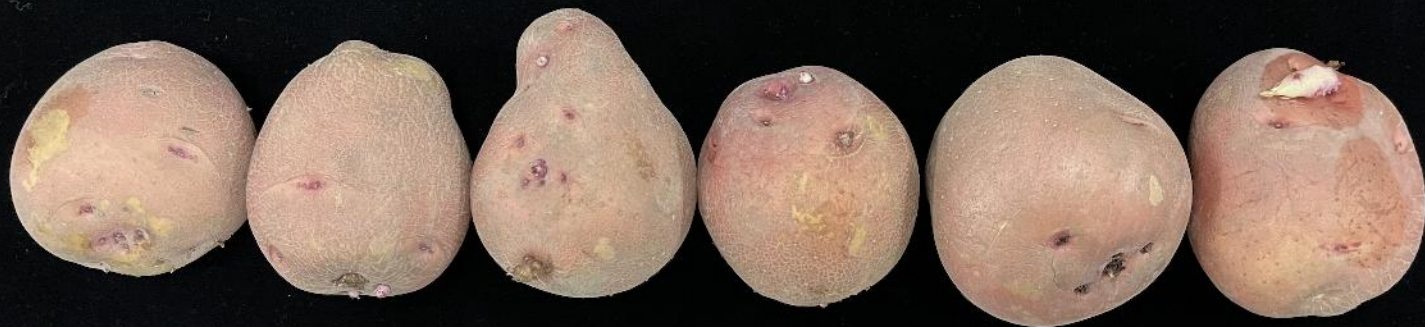

MDV: Yunsu 304

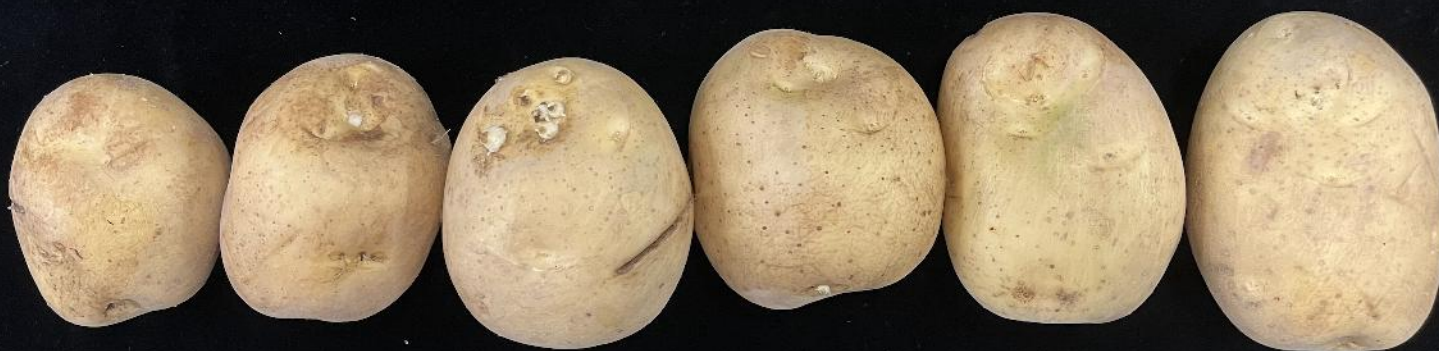

LDV: Yunsu108

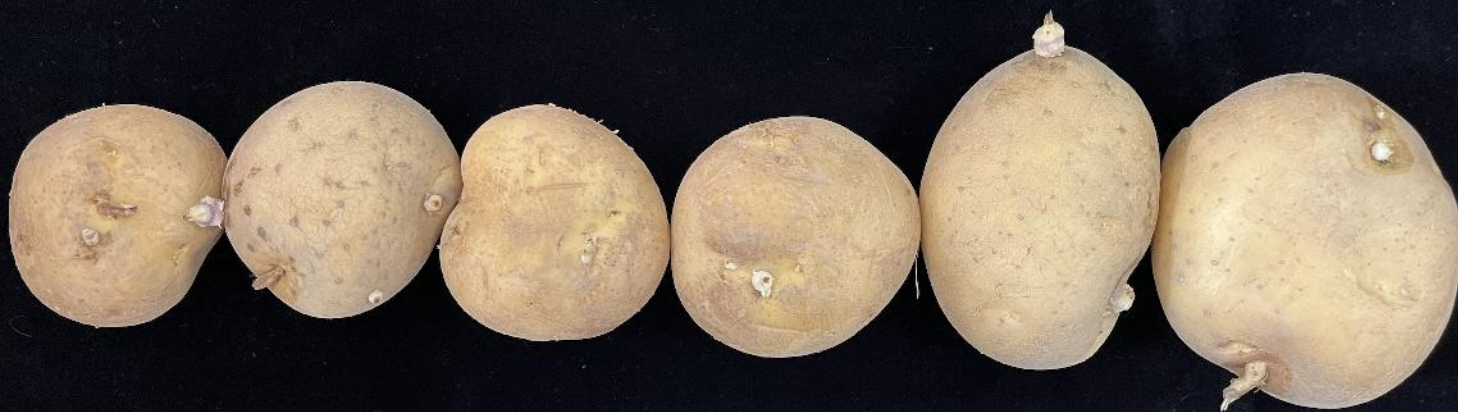

Supplement: figure_S2.pdf [file figure_S2.pdf]
