# Supplementary material for: Impact of dormancy periods on some physiological and biochemical indices of potato tubers
Source: PeerJ. 2023 Aug 28;11:e15923. doi: 10.7717/peerj.15923 (PMC10470445; doi:10.7717/peerj.15923)
Supplement: Supplemental Information 1 [file peerj-11-15923-s001.xlsx]

## Sheet: excel data sheet
variety	time	pectinase	soluble starch synthase	cellulase	sucrose synthetase	sucrase	amylase	protein	starch	reducing sugar
YunSu 108	0d	12.6553	2.88216	173.5	275.456	104.425	5.07471	13.4599	102.278	310.876	A	A
YunSu 108	0d	13.6659	2.30368	160.347	265.621	147.689	5.22849	14.4958	96.5872	273.09	A	A
YunSu 108	0d	10.8535	2.25851	162.5	259.232	129.99	4.81646	14.112	108.07	312.599	A	A
YunSu 108	7d	13.0276	3.45552	213.615	229.832	157.522	2.99549	12.3952	50.9614	311.814	A	B
YunSu 108	7d	15.1465	3.72776	230.712	228.464	157.522	2.53483	13.6858	42.7117	312.321	A	B
YunSu 108	7d	10.2317	5.18328	217.404	296.871	188.987	2.1846	12.4912	53.0648	288.305	A	B
YunSu 108	14d	12.6616	2.95095	129.498	228.863	108.358	2.78563	13.6254	117.477	282.345	A	C
YunSu 108	14d	16.7584	1.16701	149.625	251.745	128.024	2.79539	16.486	111.558	277.034	A	C
YunSu 108	14d	14.6668	2.30368	146.099	281.477	116.224	2.48378	15.4477	112.386	275.088	A	C
YunSu 108	21d	13.5795	1.81869	237.006	357.994	112.291	2.38657	17.1996	75.9366	333.896	A	D
YunSu 108	21d	12.3056	1.28841	215.199	313.866	120.157	2.55387	16.4073	105.877	297.002	A	D
YunSu 108	21d	15.4092	1.388	215.313	384.497	102.458	2.42378	18.6134	79.256	290.429	A	D
YunSu 108	28d	10.8512	2.05042	175.51	453.36	110.324	2.59329	16.2895	119.593	293.225	A	E
YunSu 108	28d	10.5681	1.54077	186.845	446.51	139.823	2.6621	14.6312	101.385	279.264	A	E
YunSu 108	28d	17.1864	1.888	155.358	437.788	106.391	2.69594	16.5556	83.8749	280.153	A	E
YunSu 108	35d	16.6019	2.42748	172.035	437.576	102.458	2.47996	13.227	75.4536	268.793	A	F
YunSu 108	35d	18.11	1.54332	146.458	376.409	139.823	2.85715	16.2137	68.3399	258.019	A	F
YunSu 108	35d	12.1715	1.68234	162.354	450.574	112.291	2.65641	14.1551	72.2346	273.945	A	F
YunSu 108	42d	12.8571	1.11181	140.169	287.673	108.358	2.36692	19.6622	72.3268	290.143	A	G
YunSu 108	42d	11.7915	1.21444	151.611	306.838	108.358	2.45318	14.0262	77.5821	305.891	A	G
YunSu 108	42d	12.4661	1.16938	148.774	271.988	104.425	2.34162	17.0798	79.5113	280.18	A	G
YunSu 108	49d	14.0215	1.10435	182.352	242.186	110.324	2.28896	12.4145	66.4994	380.238	A	H
YunSu 108	49d	11.5773	1.47316	131.417	227.35	114.258	2.68304	10.8958	67.9566	403.299	A	H
YunSu 108	49d	12.8704	1.58365	182.468	265.621	106.391	2.88667	14.8212	64.4442	389.993	A	H
YunSu 108	56d	11.3043	1.05475	157.459	287.971	112.291	3.02997	11.7256	79.3924	272.654	A	I
YunSu 108	56d	13.5419	1.09595	134.987	316.966	116.224	3.10411	15.8852	73.0503	265.362	A	I
YunSu 108	56d	12.9072	1.1673	134.613	275.524	115.162	3.33106	14.7901	70.3044	293.964	A	I
YunSu 304	0d	11.6398	2.72174	274.712	239.087	167.355	2.70244	17.2455	90.8739	330.787	B	A
YunSu 304	0d	16.8547	2.23876	248.499	204.505	143.756	2.4823	14.1001	100.005	288.459	B	A
YunSu 304	0d	17	1.68891	222.801	213.669	130.492	2.74454	15.4875	99.3972	367.907	B	A
YunSu 304	7d	16.1671	2.56297	198.439	176.606	150.426	3.16676	17.2239	40.4375	365.076	B	B
YunSu 304	7d	13.469	2.45072	238.487	198.86	171.958	2.77505	18.1507	51.4688	376.934	B	B
YunSu 304	7d	12.9862	3.03144	252.335	204.056	161.018	3.63018	16.5095	44.74	362.086	B	B
YunSu 304	14d	15.1232	1.83091	198.439	173.976	129.706	2.7198	13.5705	112.997	317.659	B	C
YunSu 304	14d	16.269	2.57592	203.445	192.195	123.33	2.31953	14.2195	123.714	361.793	B	C
YunSu 304	14d	17.15	3.45552	187.916	183.688	112.563	2.57665	11.3427	112.005	288.225	B	C
YunSu 304	21d	11.198	1.63638	223.427	238.281	129.215	3.09534	12.5829	64.9024	321.528	B	D
YunSu 304	21d	16.3232	2.99958	215.788	191.358	115.531	2.53479	13.8022	80.5623	305.969	B	D
YunSu 304	21d	11.5806	1.63459	265.923	231.678	115.987	2.47297	15.4498	70.4666	272.22	B	D
YunSu 304	28d	9.60256	1.21246	203.566	292.625	152.384	2.53479	12.149	68.757	313.289	B	E
YunSu 304	28d	11.9339	2.22	239.171	185.565	125.473	2.30852	14.573	97.1285	280.077	B	E
YunSu 304	28d	12.1885	2.7556	227.786	187.82	129.03	2.1354	12.4912	73.1164	268.939	B	E
YunSu 304	35d	10.4115	2.76353	220.209	203.615	105.271	2.47706	12.3248	100.371	303.688	B	F
YunSu 304	35d	10.2477	2.12	175.61	225.661	100.991	1.97686	11.9707	92.6571	359.638	B	F
YunSu 304	35d	10.5504	1.12704	197.649	191.312	94.9316	2.39906	13.414	82.421	310.267	B	F
YunSu 304	42d	10.9885	1.89864	222.055	216.625	116.959	2.48048	19.605	91.9493	262.166	B	G
YunSu 304	42d	10.4368	1.55915	176.329	201.765	142.938	2.36559	17.423	104.671	287.22	B	G
YunSu 304	42d	12.7408	1.21888	197.328	208.094	120.946	2.2397	15.0371	99.733	298.102	B	G
YunSu 304	49d	10.9258	1.66432	181.058	187.296	115.204	2.15245	12.9152	143.638	267.454	B	H
YunSu 304	49d	13.6432	1.344	229.094	193.054	132.007	2.35758	11.5009	107.093	282.675	B	H
YunSu 304	49d	10.4745	1.54332	255.951	239.65	139.544	3.04289	15.6594	155.233	281.88	B	H
YunSu 306	0d	14.3379	1.12594	243.493	183.688	145.58	2.24875	14.391	66.83	276.8	C	A
YunSu 306	0d	13.4902	2.91772	218.259	172.183	109.715	2.15078	16.2982	85.2826	293.218	C	A
YunSu 306	0d	14.2477	1.57592	259.712	203.546	116.642	2.11681	11.8803	63.5213	289.501	C	A
YunSu 306	7d	10.0897	1.21888	213.358	191.442	132.466	2.83714	12.111	24.5468	461.873	C	B
YunSu 306	7d	10.669	2.57971	211.16	306.583	142.009	2.46348	16.3496	34.2399	482.329	C	B
YunSu 306	7d	10.3896	1.14725	283.144	253.127	152.521	2.75541	17.7879	17.6959	464.147	C	B
YunSu 306	14d	12.5967	1.22536	308.36	224.056	290.565	3.95261	15.5466	18.3672	422.072	C	C
YunSu 306	14d	13.5655	1.60559	220.536	235.741	253.757	3.991	13.1037	16.5483	394.057	C	C
YunSu 306	14d	18.2386	1.26855	278.826	236.396	332.852	3.08108	12.0499	15.0159	407.876	C	C
YunSu 306	21d	12.2351	0.559146	252.848	208.862	120.729	2.71235	16.5499	49.7517	406.461	C	D
YunSu 306	21d	11.7883	0.54077	219.899	245.651	155.903	2.91675	14.8608	42.4842	378.583	C	D
YunSu 306	21d	15.192	0.616	233.454	201.064	121.182	2.73938	13.5488	40.023	382.129	C	D
YunSu 306	28d	12.4689	1.2626	200.241	222.327	175.47	2.65007	12.3181	116.116	383.106	C	E
YunSu 306	28d	10.8835	0.988481	192.089	272.92	168.607	2.34162	13.2001	104.213	350.457	C	E
YunSu 306	28d	11.5661	1.07448	251.493	201.412	295.796	2.48174	9.35776	105.555	393.211	C	E
YunSu 306	35d	13.41	1.16113	274.748	236.528	116.504	2.65192	14.9472	26.7732	313.911	C	F
YunSu 306	35d	13.1967	1.15069	260.019	183.532	121.58	2.61048	9.16217	29.1923	340.513	C	F
YunSu 306	35d	9.67284	1.29597	300.072	165.959	152.141	2.57011	16.0303	27.088	343.194	C	F
